# Supplementary material for: Lipoteichoic Acid Accelerates Bone Healing by Enhancing Osteoblast Differentiation and Inhibiting Osteoclast Activation in a Mouse Model of Femoral Defects
Source: PubMed Central journal article supplement (PMC7432397; doi:10.3390/ijms21155550), 2020-08-03
Supplement: ijms-21-05550-s001.pdf [file ijms-21-05550-s001.pdf]

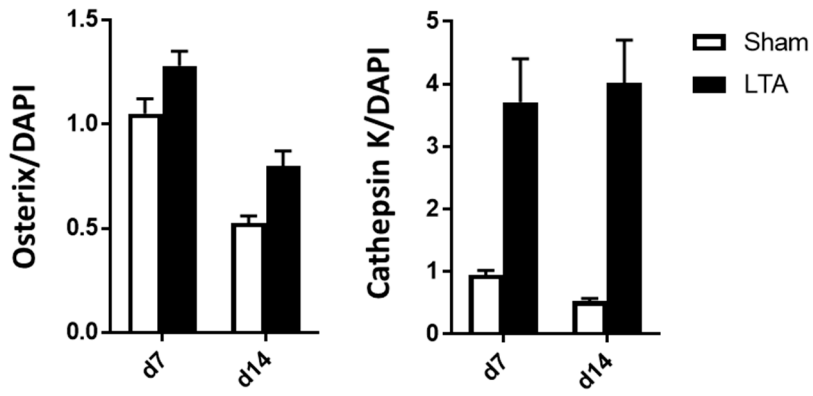

**Supplementary figure 1.** The intensities of osterix and cathepsin K signals relative to the area containing the bone tissue.
